# Supplementary material for: The QPLEX™ Plus Assay Kit for the Early Clinical Diagnosis of Alzheimer’s Disease
Source: MDPI journal article supplement (doi:10.3390/ijms241311119), 2023-07-05
Supplement: s1 [file s1]

**Table S1.** Results of ANCOVA for various factors when age and gender are set as covariates

(A)

| Education | N   | Mean   | SE    | 95% CI |        | Different<br>( $P < 0.05$ ) |
|-----------|-----|--------|-------|--------|--------|-----------------------------|
| (1) CN    | 71  | 11.285 | 0.537 | 10.231 | 12.339 |                             |
| (2) SCD   | 275 | 11.639 | 0.265 | 11.120 | 12.159 | (3)                         |
| (3) MCI   | 857 | 10.140 | 0.151 | 9.844  | 10.436 | (2)                         |
| (4) AD    | 192 | 10.767 | 0.317 | 10.146 | 11.388 |                             |

(B)

| Hypertension | N   | Mean  | SE    | 95% CI |       | Different<br>( $P < 0.05$ ) |
|--------------|-----|-------|-------|--------|-------|-----------------------------|
| (1) CN       | 71  | 0.428 | 0.060 | 0.311  | 0.545 |                             |
| (2) SCD      | 268 | 0.467 | 0.030 | 0.409  | 0.525 |                             |
| (3) MCI      | 845 | 0.522 | 0.017 | 0.489  | 0.555 |                             |
| (4) AD       | 191 | 0.490 | 0.035 | 0.421  | 0.559 |                             |

(C)

| Diabetes | N   | Mean  | SE    | 95% CI |       | Different<br>( $P < 0.05$ ) |
|----------|-----|-------|-------|--------|-------|-----------------------------|
| (1) CN   | 71  | 0.192 | 0.050 | 0.094  | 0.290 |                             |
| (2) SCD  | 268 | 0.187 | 0.025 | 0.139  | 0.236 |                             |
| (3) MCI  | 846 | 0.232 | 0.014 | 0.204  | 0.260 |                             |
| (4) AD   | 189 | 0.195 | 0.030 | 0.137  | 0.253 |                             |

(D)

| Hyperlipidemia | N   | Mean  | SE    | 95% CI |       | Different<br>( $P < 0.05$ ) |
|----------------|-----|-------|-------|--------|-------|-----------------------------|
| (1) CN         | 66  | 0.483 | 0.064 | 0.358  | 0.608 |                             |
| (2) SCD        | 259 | 0.556 | 0.031 | 0.495  | 0.616 | (4)                         |
| (3) MCI        | 809 | 0.474 | 0.018 | 0.439  | 0.509 |                             |
| (4) AD         | 188 | 0.403 | 0.036 | 0.332  | 0.475 | (2)                         |

(E)

| Stroke  | N   | Mean  | SE    | 95% CI |       | Different<br>( $P < 0.05$ ) |
|---------|-----|-------|-------|--------|-------|-----------------------------|
| (1) CN  | 70  | 0.011 | 0.026 | -0.041 | 0.062 |                             |
| (2) SCD | 267 | 0.058 | 0.013 | 0.033  | 0.084 |                             |
| (3) MCI | 842 | 0.045 | 0.007 | 0.030  | 0.059 |                             |
| (4) AD  | 189 | 0.059 | 0.016 | 0.028  | 0.089 |                             |

(F)

| Angina  | N   | Mean  | SE    | 95% CI |       | Different<br>( $P < 0.05$ ) |
|---------|-----|-------|-------|--------|-------|-----------------------------|
| (1) CN  | 71  | 0.094 | 0.033 | 0.029  | 0.159 |                             |
| (2) SCD | 263 | 0.073 | 0.017 | 0.041  | 0.106 |                             |
| (3) MCI | 834 | 0.091 | 0.009 | 0.072  | 0.110 |                             |
| (4) AD  | 188 | 0.038 | 0.020 | -0.001 | 0.077 |                             |

(G)

| Thyroid | N   | Mean  | SE    | 95% CI |       | Different<br>( $P < 0.05$ ) |
|---------|-----|-------|-------|--------|-------|-----------------------------|
| (1) CN  | 71  | 0.112 | 0.041 | 0.032  | 0.192 |                             |
| (2) SCD | 260 | 0.179 | 0.021 | 0.139  | 0.220 | (4)                         |
| (3) MCI | 841 | 0.131 | 0.012 | 0.108  | 0.153 |                             |
| (4) AD  | 188 | 0.083 | 0.024 | 0.035  | 0.130 | (2)                         |

(H)

| Surgical history | N   | Mean  | SE    | 95% CI |       | Different<br>( $P < 0.05$ ) |
|------------------|-----|-------|-------|--------|-------|-----------------------------|
| (1) CN           | 69  | 0.629 | 0.060 | 0.512  | 0.746 |                             |
| (2) SCD          | 267 | 0.677 | 0.029 | 0.619  | 0.735 |                             |
| (3) MCI          | 830 | 0.626 | 0.017 | 0.593  | 0.659 |                             |
| (4) AD           | 185 | 0.587 | 0.035 | 0.518  | 0.656 |                             |

(I)

| Cancer  | N   | Mean  | SE    | 95% CI |       | Different<br>( $P < 0.05$ ) |
|---------|-----|-------|-------|--------|-------|-----------------------------|
| (1) CN  | 71  | 0.082 | 0.039 | 0.006  | 0.159 |                             |
| (2) SCD | 270 | 0.123 | 0.019 | 0.085  | 0.162 |                             |
| (3) MCI | 847 | 0.119 | 0.011 | 0.097  | 0.140 |                             |
| (4) AD  | 190 | 0.102 | 0.023 | 0.056  | 0.147 |                             |

(J)

| Family history | N   | Mean  | SE    | 95% CI |       | Different<br>( $P < 0.05$ ) |
|----------------|-----|-------|-------|--------|-------|-----------------------------|
| (1) CN         | 71  | 0.237 | 0.057 | 0.125  | 0.349 |                             |
| (2) SCD        | 272 | 0.375 | 0.028 | 0.320  | 0.431 |                             |
| (3) MCI        | 851 | 0.302 | 0.016 | 0.270  | 0.334 | (4)                         |
| (4) AD         | 191 | 0.409 | 0.034 | 0.343  | 0.475 | (3)                         |

|     |          |     |       |       |        |       |                             |
|-----|----------|-----|-------|-------|--------|-------|-----------------------------|
| (K) | Drinking | N   | Mean  | SE    | 95% CI |       | Different<br>( $P < 0.05$ ) |
|     | (1) CN   | 71  | 0.599 | 0.055 | 0.490  | 0.707 | (4)                         |
|     | (2) SCD  | 271 | 0.463 | 0.027 | 0.409  | 0.517 |                             |
|     | (3) MCI  | 851 | 0.451 | 0.016 | 0.420  | 0.482 |                             |
|     | (4) AD   | 191 | 0.389 | 0.033 | 0.324  | 0.453 | (1)                         |

|     |         |     |       |       |        |       |                             |
|-----|---------|-----|-------|-------|--------|-------|-----------------------------|
| (L) | Smoking | N   | Mean  | SE    | 95% CI |       | Different<br>( $P < 0.05$ ) |
|     | (1) CN  | 71  | 0.218 | 0.039 | 0.141  | 0.295 |                             |
|     | (2) SCD | 271 | 0.247 | 0.019 | 0.209  | 0.285 |                             |
|     | (3) MCI | 851 | 0.236 | 0.011 | 0.215  | 0.258 |                             |
|     | (4) AD  | 191 | 0.191 | 0.023 | 0.145  | 0.236 |                             |

|     |         |     |        |       |        |        |                             |
|-----|---------|-----|--------|-------|--------|--------|-----------------------------|
| (M) | BMI     | N   | Mean   | SE    | 95% CI |        | Different<br>( $P < 0.05$ ) |
|     | (1) CN  | 32  | 23.338 | 0.574 | 22.211 | 24.464 |                             |
|     | (2) SCD | 264 | 24.000 | 0.199 | 23.609 | 24.390 | (4)                         |
|     | (3) MCI | 810 | 23.614 | 0.114 | 23.390 | 23.837 |                             |
|     | (4) AD  | 188 | 23.004 | 0.236 | 22.541 | 23.466 | (2)                         |

|     |         |     |       |       |        |       |                             |
|-----|---------|-----|-------|-------|--------|-------|-----------------------------|
| (N) | Anxiety | N   | Mean  | SE    | 95% CI |       | Different<br>( $P < 0.05$ ) |
|     | (1) CN  | 71  | 0.156 | 0.041 | 0.076  | 0.236 |                             |
|     | (2) SCD | 270 | 0.258 | 0.020 | 0.218  | 0.298 |                             |
|     | (3) MCI | 850 | 0.259 | 0.012 | 0.236  | 0.281 |                             |
|     | (4) AD  | 189 | 0.225 | 0.024 | 0.177  | 0.272 |                             |

ANCOVA results for (A) education years, (B) hypertension, (C) diabetes, (D) hyperlipidemia, (E) stroke, (F) angina, (G) thyroid, (H) surgical history, (I) cancer, (J) family history of dementia, (K) drinking, (L) smoking, (M) BMI, and (N) anxiety. If the Bonferroni corrected  $P$ -value of ANCOVA was less than 0.05, it was indicated in the "Different ( $P < 0.05$ )" column. ANCOVA, analysis of covariance; SE, standard error; CI, confidence interval; BMI, body mass index; CN, cognitively normal; SCD, subjective cognitive decline; MCI, mild cognitive impairment; AD, Alzheimer's disease.
